# Supplementary material
Source: Springer Nature journal article supplement (https://www.springermedizin.de/resource/supplementary/12891_2013_1935_MOESM1_ESM.pdf/9508838)

FIRST STEP

Review of existing evidence  
(guidelines, indicators and  
publications)

SECOND STEP

Develop of a set of potential  
indicators by WG-I

Review and modification of  
potential indicators by WG-I

Indicators rated as valid

THIRD STEP

Assess of indicators reliability and  
feasibility using 80 patients per  
centre for each group

Indicators rated as valid, reliable  
and feasible

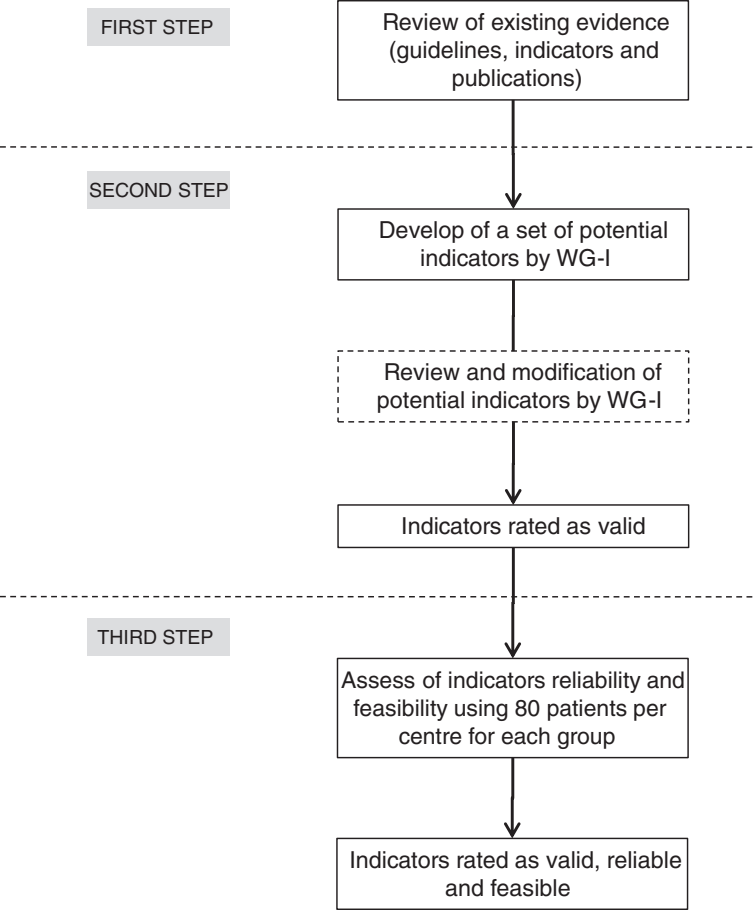

Supplement: MOESM1 [file 9508838]
